# Supplementary material for: High performance nonenzymatic electrochemical sensors via thermally grown Cu native oxides (CuNOx) towards sweat glucose monitoring
Source: Royal Society of Chemistry journal article supplement (doi:10.1039/d3an01153d), 2023-09-11
Supplement: d3an01153d1.pdf [file d3an01153d1.pdf]

## Supplementary Information for High Performance Nonenzymatic Electrochemical Sensors via Thermally Grown Cu Native Oxides (CuNO<sub>x</sub>) Towards Sweat Glucose Monitoring

Maksud M. Alam<sup>1</sup>, Matiar M. R. Howlader<sup>1\*</sup>

<sup>1</sup>Department of Electrical and Computer Engineering, McMaster University, Hamilton, ON L8S 4K1, Canada

\* E-mail: howladm@mcmaster.ca

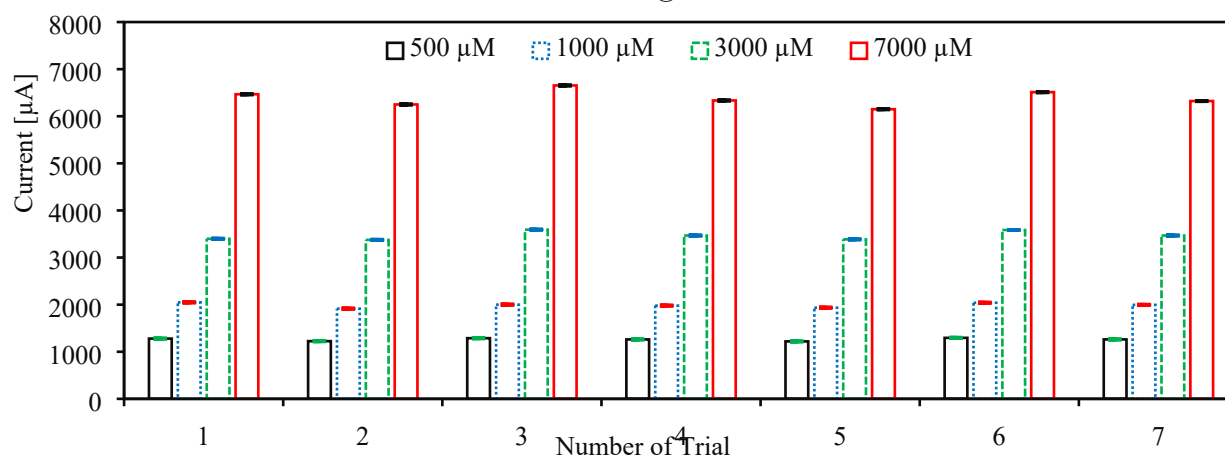

Fig. S1. Repeatability test of the CuNO<sub>x</sub> electrode annealed at 280°C in a 0.1 M NaOH alkaline solution with glucose concentrations of 0.5-, 1.0-, 3.0-, and 7.0-mM. A distinct electrode was used for each concentration in the same solution. The solution was shaken before each subsequent CV measurement.

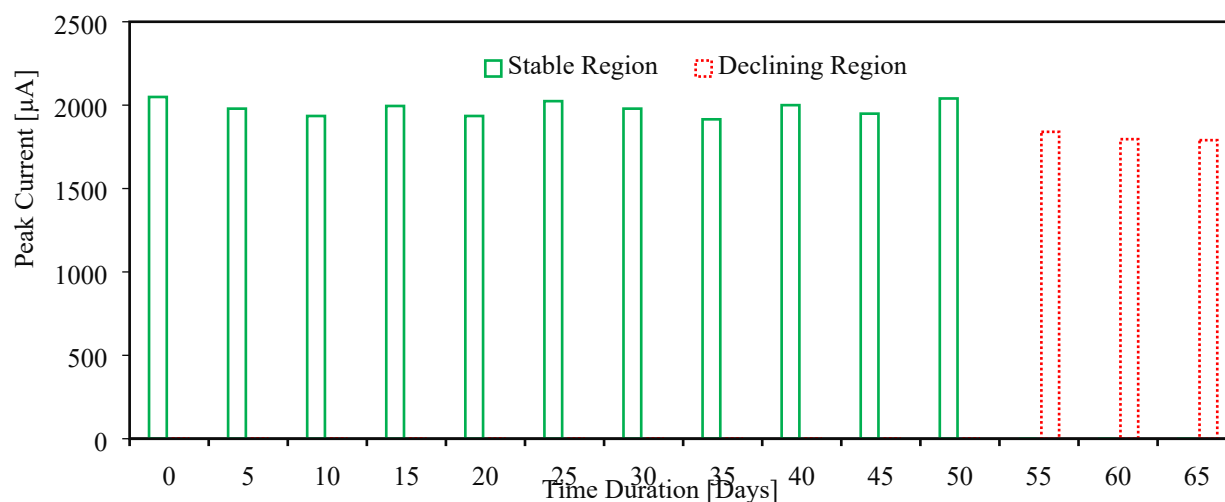

Fig. S2. Stability test of the CuNO<sub>x</sub> electrode annealed at 280°C, conducted in a 0.1 M NaOH alkaline solution with a glucose concentration of 1.0 mM.
